# Supplementary material for: High fat intake aggravates hyperlipidemia and suppresses fatty liver symptoms induced by a high-sucrose diet in rats
Source: Royal Society of Chemistry journal article supplement (doi:10.1039/d4fo00863d), 2024-01-01
Supplement: d4fo00863d1.pdf [file d4fo00863d1.pdf]

## Supplementary

**Table S1.** Primers for qPCR.

| Gene              | Accession number | Forward primer (5'→3')  | Reverse primer (5'→3')  |
|-------------------|------------------|-------------------------|-------------------------|
| ACACA             | NM_022193        | GCCAGCAGAATTTGTTACTC    | ATAAGACCACCGCCGGATAG    |
| ACLY              | NM_016987        | TGGACTTTGACTACGTGTGC    | AAGACAGGGATCAGGATTTTC   |
| ACOX1             | NM_017340        | TGATGAAATACGCCAGGTG     | CCCATACGTCAGTTGTTAC     |
| ADIPOQ            | NM_144744.3      | CGCTTATGTGTATCGCTCAG    | GTCCCGGAATGTTGCAGTAG    |
| APOE              | NM_138828        | TGAACCGCTTCTGGGATTAC    | TGTGTGACTTGGGAGCTCTG    |
| BMAL1             | NM_024362        | TTTGTAGATCAGAGGGCGAC    | GTACCTAGAAGTTCTGTGG     |
| CD36              | NM_031561.2      | GAAGCACTGAAGAATCTGAAGAG | TCCAACACCAAGTAAGACCATC  |
| CLOCK             | NM_001289832     | AGTTAGGGCTGAAAGACGGC    | TTCCAGTGCTTCTTGAGAC     |
| CPT1a             | NM_031559        | GGGATTAAGTTCTGCTATG     | AAGATGTGTGAGGAAGGTGG    |
| CRY1              | NM_198750        | CACTATGCTCACGGAGACAG    | CCCATGGAGCTTCTTCTTTG    |
| CYP7A1            | NM_012942        | TGTGTGAGGGACCAGGTCTCT   | AGCTCAAAGGTTGGAGGA      |
| DBP               | NM_001289982     | CTCTAGGGACACACCCAGTCTT  | AGGCTTCAATTCCTCCTCTGAGA |
| DEC1              | NM_053328        | GAAACCATTGGACTCAGCTC    | TTTCCCAGGGCCTTCTGATC    |
| DGAT1             | NM_053437.2      | TGTTCCGCCTTTGGGCATTG    | GGGCATCATAGTTGAGCACG    |
| E4BP4             | NM_053727.2      | ACTGGCATCACAAAGAACTG    | AGACCACCTCTGCGGATAAG    |
| ELOVL6            | NM_134383        | ACCCGAACTAGGTGATACG     | CCCAGCTACCATGTCTTTG     |
| FAS               | NM_017332        | CCAAGCAGGCACACACAATG    | GATACCTCCGTCGACAATAG    |
| FBP1              | NM_012558        | TGTATAGCGTTCAGTCTCTCC   | GGGTGCTGATATCCGTTTCCG   |
| GCK               | NM_001270849     | AGAAGATCATCGGTGGGAAG    | TTAAGCAGCACAAAGTCGTAC   |
| GPAM              | NM_017274        | ACACCATCCCTGACATCCTG    | TAACGCCTCTTGCCACACTC    |
| G6PC              | NM_013098        | TCCGGTGCTTGAATGTCGTC    | TCTGGAGGCTGGCATTGTAG    |
| HMGCR             | NM_013134        | TGCACAGACTCCTCAGACGTG   | TTCGTCAAACACCAGCTTCC    |
| HSL               | NM_012859        | TCCCAGGAAGAGGCTGAAAC    | CCAGCAGAGGAGACATGAAG    |
| LPL               | NM_012598.2      | TCCGGGCCAGCAACATTATC    | GCCACATCATTTCCACCAG     |
| LXR $\alpha$      | NM_031627        | TCCGAGATCTGGGATGTCCA    | TGCCATGCAAGGGTCTCTTT    |
| ME                | NM_012600        | CTTGTTGCCACCCTGCATTG    | TAAGCACACTGTAGAAGAGC    |
| MTP               | NM_001107727.1   | GAGAGGTCCGATTTACAAC     | ATAGGTAGTGACAGAGTGG     |
| PER1              | NM_001034125     | CTTCGGGAGCTCAAACCTCG    | TATTCCTGGTTAGCCTGCAC    |
| PEPCK             | NM_198780        | AACTGTTGGCTGGCTCTCAC    | TCTGCTCTTGGTAATGATG     |
| PFKL              | NM_013190        | TGAGCATAGACAAGGGTTTC    | CCGAGTTCCATGTGAGTTCC    |
| PGC-1 $\alpha$    | NM_031347        | TCCTTTAACTCTCCGTGTCG    | GATCTTGACCTGGAATATGG    |
| PGC-1 $\beta$     | NM_176075        | AAGAGCACTGGACCTAGACC    | GCTTGTTGACATCCCCTTTC    |
| PKLR              | NM_012624        | CTGAGCGTATCCTGAAATGC    | AAATAGGGTGTAACTGGGTC    |
| PPAR $\alpha$     | NM_013196        | TTCGGCTAAAGCTGGCGTAC    | ACTGGCATTFTTCCGGTTC     |
| PPAR $\delta$     | NM_013141        | AAGCCATCCAGGACACCATC    | CACTCTCCGTCTTCTTCAGC    |
| PPAR $\gamma$     | NM_001145366     | CTGTGGACCTCTCTGTGATG    | CCGTGGTAAAGGGTTTGATG    |
| REV-ERB $\alpha$  | NM_147210        | CCTTTGAGGTGCTGATGGTG    | ACATGACTGTCTGGTCCTTC    |
| 18S ribosomal RNA | NR_046237        | CGCCGCTAGAGGTGAAATTC    | TTGGCAAATGCTTTCCGCTC    |
| SCD1              | NM_139192        | ATCTCCAGTTCTACACGAC     | GGCACCTTCTCATCTTCTC     |
| SREBP1            | NM_001276707     | GGAGCCATGGATTGCACATT    | AGGAAGGCTTCCAGAGAGGA    |
| SREBP2            | NM_001033694.2   | ACGGTGTGATTGTCTTGAGC    | TTTGGCGAGGTCTAGGTCTG    |

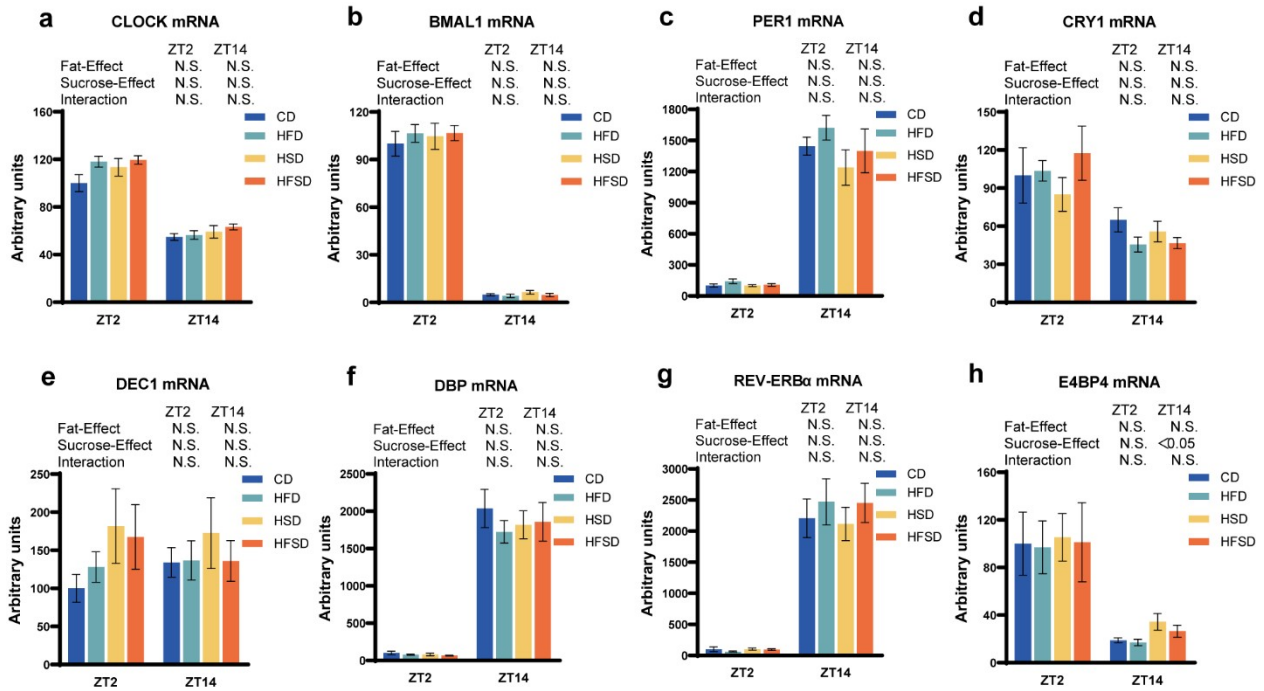

**Figure S1.** High-sucrose and high-fat diet did not change the hepatic clock gene in rats. Expression patterns of the genes (a) CLOCK, (b) BMAL1, (c) PER1, (d) CRY1, (e) DEC1, (f) DBP, (g) REV-RBP $\alpha$ , (h) E4BP4 as relative to the ApoE mRNA levels. CD: control starch diet group; HFD: high-fat diet group; HSD: high-sucrose diet group; HFSD: high-sucrose/fat diet group. ZT: Zeitgeber time. ZT2 is 2 hours after lights on, and ZT14 is 2 hours after lights off. All values are means  $\pm$  SEM, n=6 of each group timepoint. The statistical results of two-way ANOVA are indicated. “<0.05” denotes statistical significance ( $P < 0.05$ ) for the factors or their interaction. N.S.: not significant.
